# Supplementary material for: Ocular Delivery of Bimatoprost-Loaded Solid Lipid Nanoparticles for Effective Management of Glaucoma
Source: MDPI journal article supplement (doi:10.3390/ph16071001), 2023-07-13
Supplement: s1 [file s1]

Table S1. Results of statistical analysis of all dependent variables

| Source                   | Y <sub>1</sub> |         | Y <sub>2</sub> |          |
|--------------------------|----------------|---------|----------------|----------|
|                          | F-Value        | p-Value | F-Value        | p-Value  |
| Model                    | 81.94          | <0.0001 | 34.60          | < 0.0001 |
| A: Drug:lipid ratio      | 17.27          | 0.0043  | 52.35          | 0.0002   |
| B: Sonication time       | 71.69          | <0.0001 | 39.60          | 0.0004   |
| Lack of Fit              | 3.82           | 0.114   | 1.78           | 0.2898   |
| R <sup>2</sup> analysis  |                |         |                |          |
| R <sup>2</sup>           | 0.9832         |         | 0.9611         |          |
| Adjusted R <sup>2</sup>  | 0.9712         |         | 0.9333         |          |
| Predicted R <sup>2</sup> | 0.9046         |         | 0.8158         |          |
| Adequate precision       | 23.9795        |         | 21.0007        |          |

Table S2: *In vitro* release kinetics of optimized Bimatoprost-loaded SLNs

| Formulation             | Zero-order     | First-order | Higuchi | Kores-Peppas |
|-------------------------|----------------|-------------|---------|--------------|
|                         | R <sup>2</sup> |             |         |              |
| Bimatoprost-loaded SLNs | 0.9753         | 0.7468      | 0.9917  | 0.9705       |

Table 3: Stability study of optimized Bimatoprost-loaded SLNs

| Parameters                | Day 0        | Storage for 4 weeks at 4 ± 1 °C | Storage for 8 weeks at 4 ± 1 °C |
|---------------------------|--------------|---------------------------------|---------------------------------|
| Particle size (nm)        | 183.3 ± 13.3 | 189.6 ± 17.2                    | 196.5 ± 19.8                    |
| Zeta potential (mV)       | − 9.9 ± 1.2  | − 9.4 ± 1.6                     | − 9.1 ± 1.9                     |
| Entrapment efficiency (%) | 71.8 ± 1.1   | 70.1 ± 0.9                      | 69.7 ± 1.7                      |

Data represent the mean ± SD
